# Supplementary material for: MDHGI: Matrix Decomposition and Heterogeneous Graph Inference for miRNA-disease association prediction
Source: PLoS Comput Biol. 2018 Aug 24;14(8):e1006418. doi: 10.1371/journal.pcbi.1006418 (PMC6126877; doi:10.1371/journal.pcbi.1006418)
Supplement: S1 Text — (DOCX) [file pcbi.1006418.s001.docx]

**MDHGI: Matrix Decomposition and Heterogeneous Graph Inference for miRNA-disease association prediction** Xing Chen1, *, Jun Yin1, Jia Qu1, Li Huang2

1School of Information and Control Engineering, China University of Mining and Technology, Xuzhou, 221116, China

2 Business Analytics Centre, National University of Singapore, 119613, Singapore

*Corresponding author

**Email**: [xingchen@amss.ac.cn](mailto:xingchen@amss.ac.cn)

**Theorem 1.** Whenandare properly normalized utilizing Eq. (3) and Eq. (2) respectively, it is guaranteed that Eq. (1) will converge.

(1)

(2)

(3)

**Proof of Theorem 1**

In order to make the whole proof process more concise, we denote *SR*, *SD* and *P* to *A*, *B* and *X* respectively where *A*, *B* and *X* are , and matrices respectively. Besides, we denote and as the row of *A* and column of *A* respectively. is used to represent the value of *.* We use the similar way to define the matrix *B* and *X*. After that, based on Eq. (1), we can obtain:

(4)

As for , we can also get

(5)

Here we use to denote and then Eq. (1) can be written as:

(6)

Let *C* denote and , , , ,, , , .

Then we can get and .

Through comparing the above two equations, we can find that *C* is a symmetrical matrix. The Eq. (6) can be written as follows after using to represents :

(7)

Since we wish to get a converged solution for Eq. (7), *C* can be normalized as , where *D* is a diagonal matrix with equals to the sum of the row of *C.* Hence, we can also get and where . After incorporating the above equation into , we can obtain:

(8)

Therefore, if we normalize *A* and *B* as and

We can get . Thus, we can rewrite Eq. (7) as with this equation.
